# Supplementary material
Source: publisher figshare collection journal article supplement (https://sage.figshare.com/ndownloader/files/12388838)

**Supplementary material**

Results of MFA and impact assessment of GHG emissions for the prevention scenario  
(wheat FSC in the US, example of application)

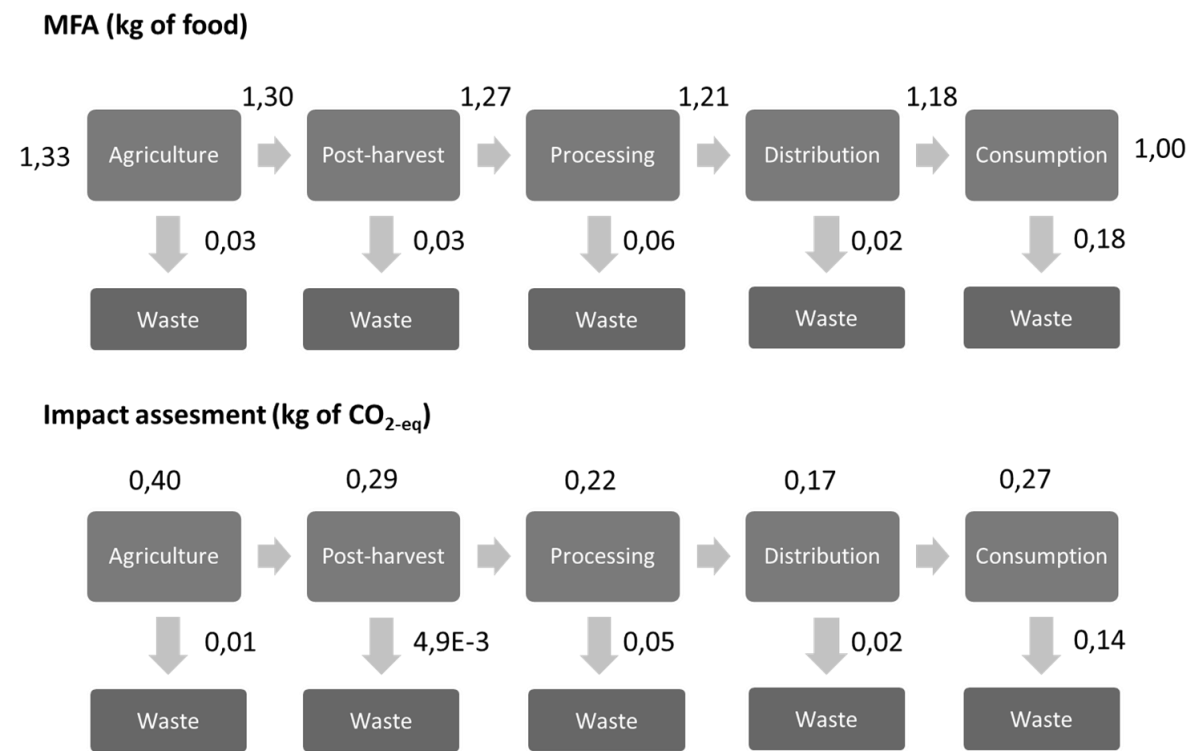

Supplement: Supplementary file 1 [file 12388838]
